# Supplementary material for: Two photochromic methylated nicotinohydrazide iodoargentate hybrids
Source: Royal Society of Chemistry journal article supplement (doi:10.1039/c6ra20084b), 2016-01-01
Supplement: c6ra20084b1.pdf [file c6ra20084b1.pdf]

Supporting Information (SI)

## Two Photochromic Methylated Nicotinohydrazide Iodoargentate Hybrids

Junju Shen, Feng Wang, Xiangxia Li, Tanlai Yu, Pengfei Hao and Yunlong Fu\*

School of Chemistry & Material Science, Shanxi Normal University, Linfen 041004, P. R. China

Fax & Tel: +86 357 2053716; E-mail: yunlongfu@sxnu.edu.cn

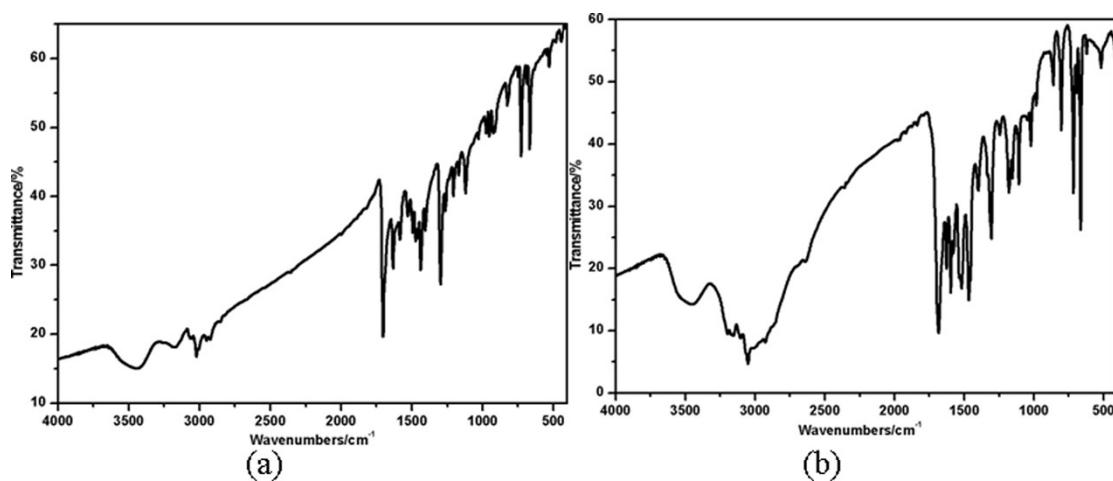

Fig. S1 FT-IR spectra of **1** (a) and **2** (b).

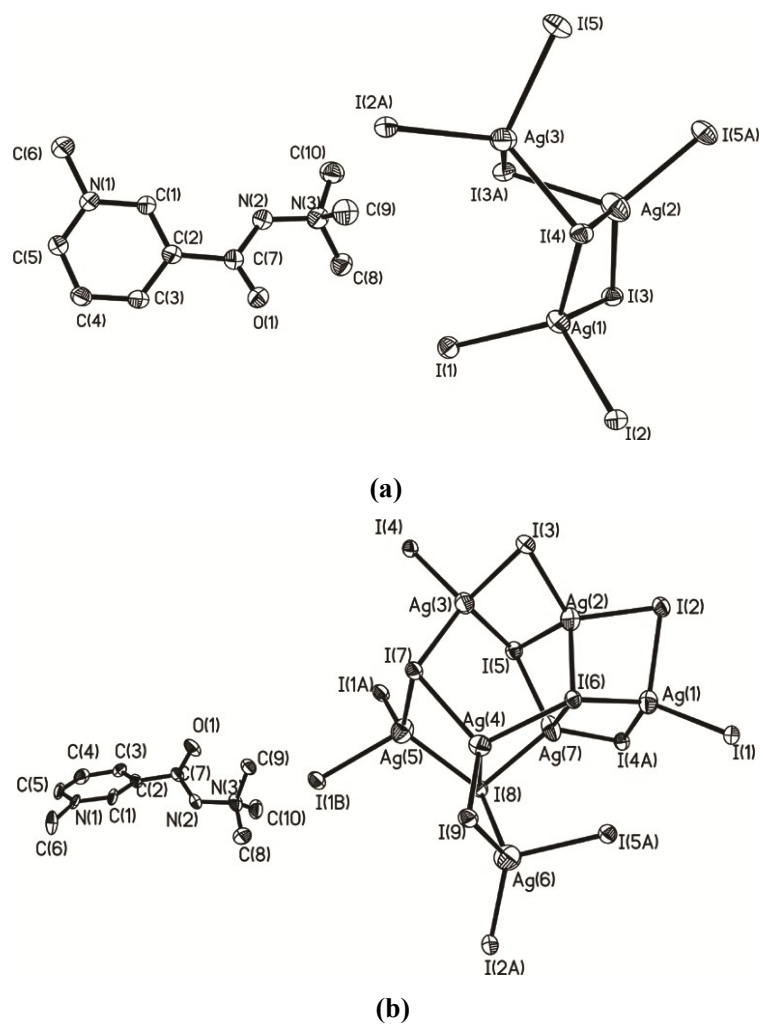

Fig. S2 The structure unit diagrams of **1** (a) and **2** (b). The disordered Ag atoms in **1** are omitted for clarity.

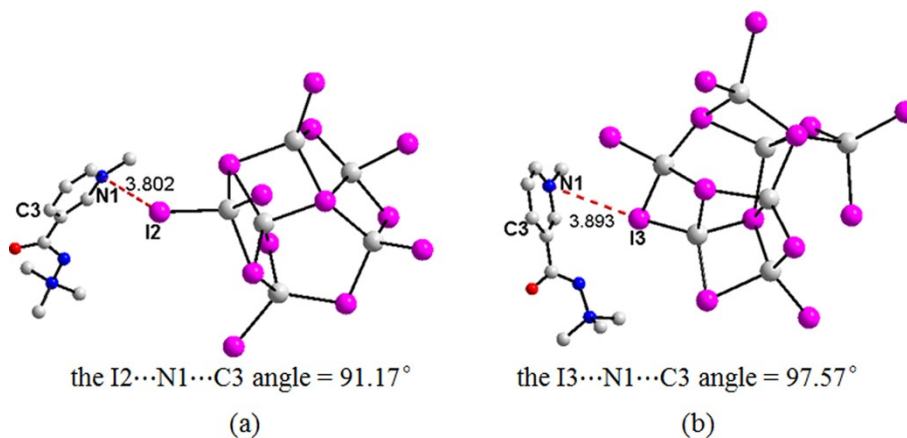

Fig. S3 The shortest distance and orientation between the acceptor (N atom of pyridinium ring of  $\text{MNH}^{2+}$  cation) and donor (I atom of iodoargentate anions) in **1** (a) and **2** (b). Distances are in angstrom ( $\text{\AA}$ ).

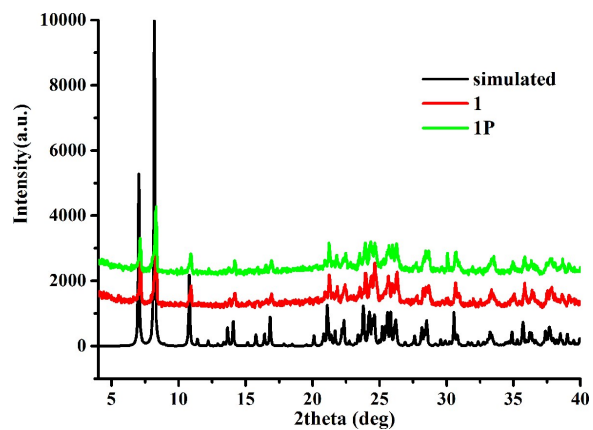

(a)

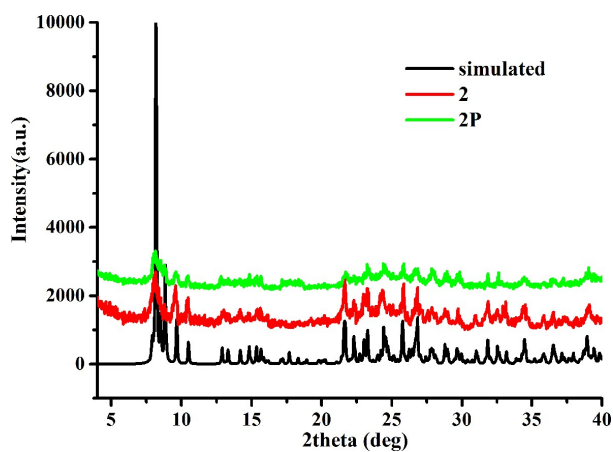

(b)

Fig. S4 The PXRD patterns of **1** (a) and **2** (b) before and after irradiation.

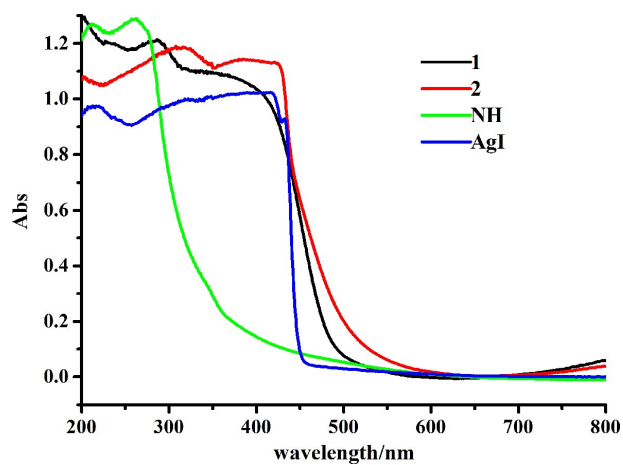

Fig. S5 UV-vis absorption spectra of starting materials, **1** and **2** before irradiation.

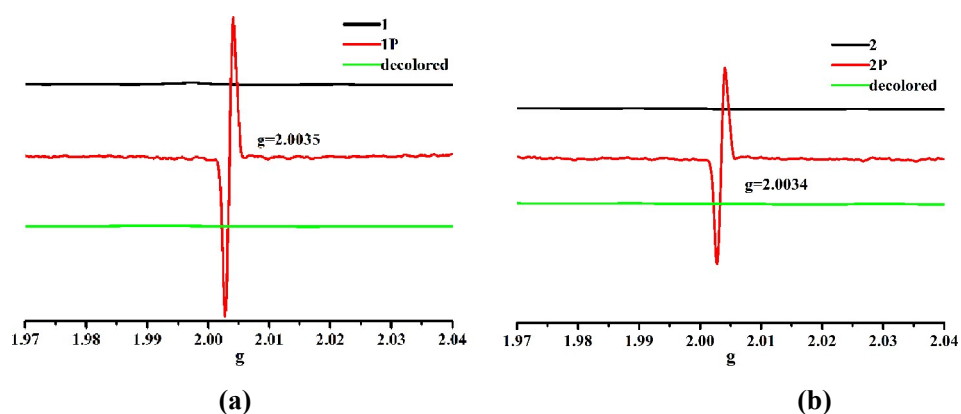

Fig. S6 EPR spectra of **1** (a) and **2** (b).

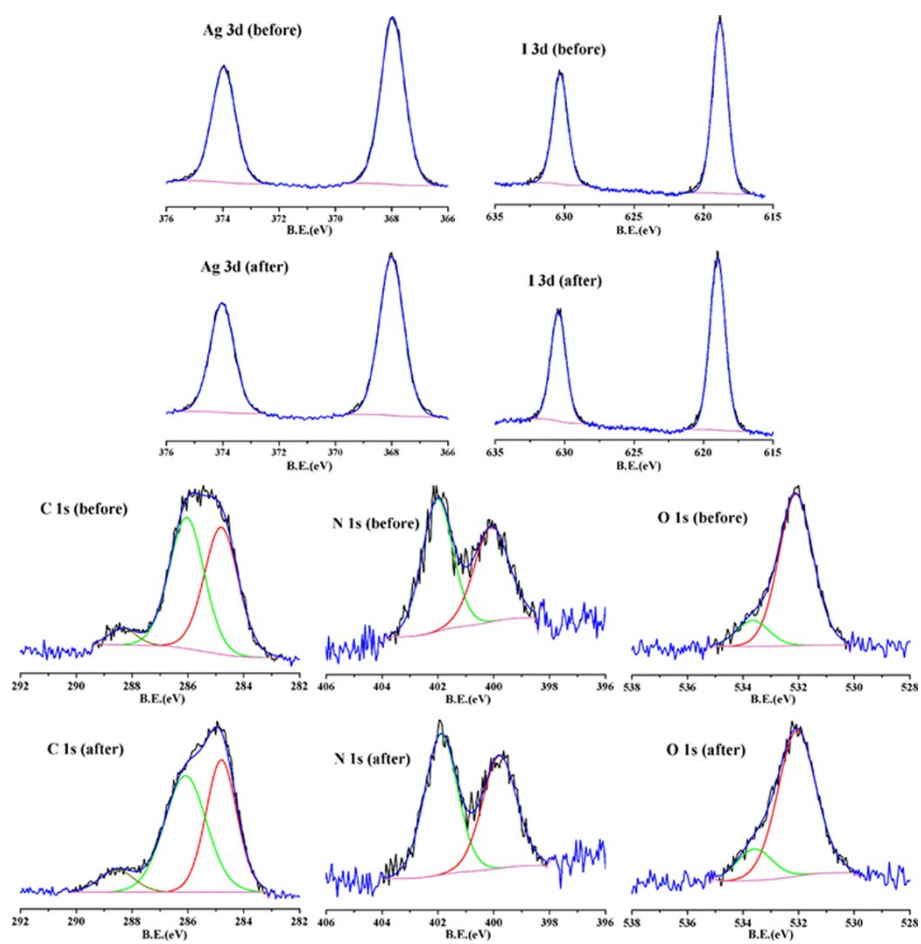

Fig. S7 XPS core-level spectra of **1** before and after irradiation.

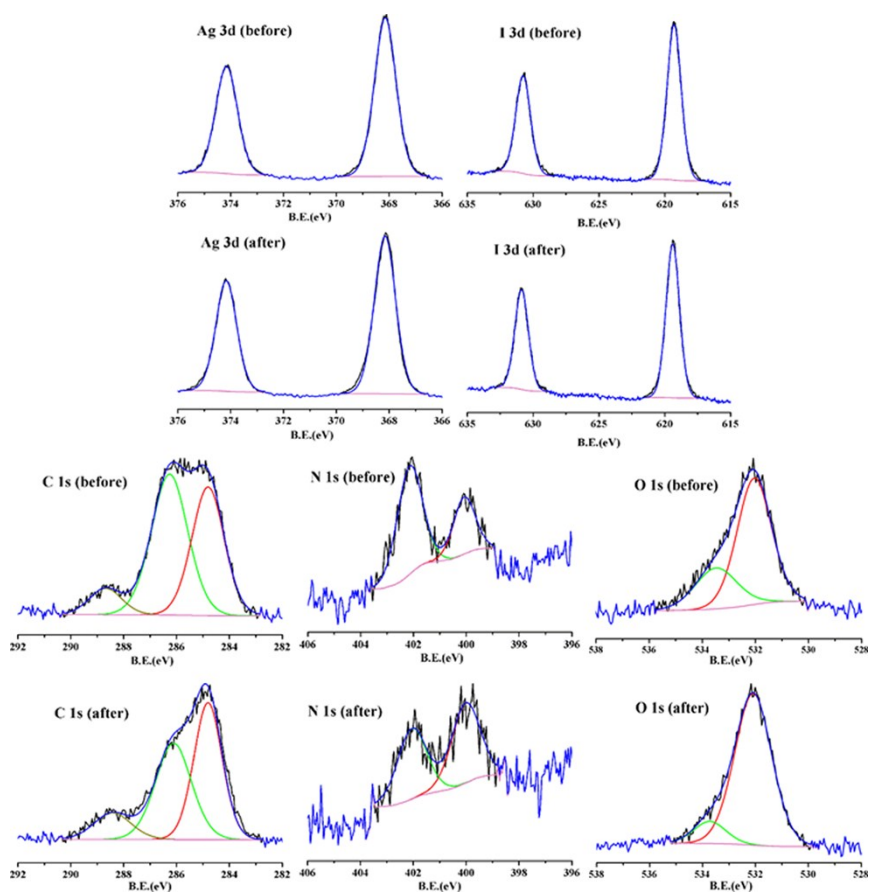

Fig. S8 XPS core-level spectra of **2** before and after irradiation.

Table S1. Selected bond lengths [Å] and angles [°] for **1** and **2**

| Compound <b>1</b> |            |                     |            |
|-------------------|------------|---------------------|------------|
| Ag(1)-I(1)        | 2.7908(16) | Ag(2)-I(3)#1        | 2.935(2)   |
| Ag(1)-I(2)        | 2.8762(17) | Ag(3)-I(2)#4        | 2.8042(18) |
| Ag(1)-I(3)        | 2.8876(17) | Ag(3)-I(4)          | 2.8688(17) |
| Ag(1)-I(4)        | 2.9074(15) | Ag(3)-I(5)          | 2.8847(17) |
| Ag(2)-I(5)#2      | 2.793(2)   | Ag(3)-I(3)#1        | 2.9774(17) |
| Ag(2)-I(4)        | 2.833(2)   | Ag(3)-Ag(2)#1       | 2.997(2)   |
| Ag(2)-I(3)        | 2.907(2)   |                     |            |
| I(1)-Ag(1)-I(2)   | 109.95(5)  | I(5)#2-Ag(2)-I(3)#1 | 115.92(8)  |
| I(1)-Ag(1)-I(3)   | 104.51(5)  | I(4)-Ag(2)-I(3)#1   | 95.18(6)   |
| I(2)-Ag(1)-I(3)   | 110.61(5)  | I(3)-Ag(2)-I(3)#1   | 93.41(6)   |
| I(1)-Ag(1)-I(4)   | 120.98(5)  | I(2)#4-Ag(3)-I(4)   | 120.21(6)  |
| I(2)-Ag(1)-I(4)   | 99.33(5)   | I(2)#4-Ag(3)-I(5)   | 102.72(5)  |
| I(3)-Ag(1)-I(4)   | 111.38(5)  | I(4)-Ag(3)-I(5)     | 113.25(6)  |
| I(5)#2-Ag(2)-I(4) | 117.29(7)  | I(2)#4-Ag(3)-I(3)#1 | 115.24(6)  |
| I(5)#2-Ag(2)-I(3) | 117.36(7)  | I(4)-Ag(3)-I(3)#1   | 93.51(5)   |
| I(4)-Ag(2)-I(3)   | 113.01(7)  | I(5)-Ag(3)-I(3)#1   | 112.33(5)  |
| Compound <b>2</b> |            |                     |            |
| Ag(1)-I(1)        | 2.7760(9)  | Ag(5)-I(7)          | 2.8562(11) |
| Ag(1)-I(4)#1      | 2.8546(10) | Ag(5)-I(1) #3       | 2.9647(10) |
| Ag(1)-I(2)        | 2.8602(10) | Ag(6)- I(9)         | 2.7634(11) |
| Ag(1)-I(6)        | 3.0209(10) | Ag(6)-I(2)#1        | 2.8115(12) |
| Ag(2)-I(3)        | 2.7807(10) | Ag(6)-I(5)#1        | 2.9573(12) |
| Ag(2)-I(2)        | 2.7930(10) | Ag(6)-I(8)          | 3.1233(11) |
| Ag(2)-I(6)        | 2.9199(9)  | Ag(7)- I(4)#1       | 2.8463(9)  |
| Ag(2)-I(5)        | 2.9551(10) | Ag(7)-I(5)          | 2.9009(11) |
| Ag(3)-I(3)        | 2.8118(10) | Ag(7)-I(8)          | 2.8081(10) |
| Ag(3)-I(7)        | 2.8171(9)  | Ag(7)- I(6)         | 2.9520(10) |
| Ag(3)-I(4)        | 2.8254(9)  | Ag(1)-Ag(2)         | 3.3284(11) |
| Ag(3)-I(5)        | 2.9058(9)  | Ag(1)-Ag(7)         | 3.0051(11) |
| Ag(4)-I(9)        | 2.7948(9)  | Ag(2)-Ag(3)         | 3.1249(11) |
| Ag(4)-I(7)        | 2.8516(9)  | Ag(2)-Ag(6)#2       | 3.1255(12) |
| Ag(4)-I(8)        | 2.9308(9)  | Ag(4)-Ag(5)         | 3.3170(11) |
| Ag(4)-I(6)        | 2.9659(9)  | Ag(4)-Ag(6)         | 3.3277(12) |
| Ag(5)-I(8)        | 2.8994(10) | Ag(6)-Ag(2)#1       | 3.1255(12) |
| Ag(5)-I(1)#2      | 2.8266(10) |                     |            |
| I(1)-Ag(1)-I(4)#1 | 117.50(3)  | I(9)-Ag(4)-I(6)     | 107.16(3)  |
| I(1)-Ag(1)-I(2)   | 107.03(3)  | I(7)-Ag(4)-I(6)     | 105.07(3)  |
| I(4)#1-Ag(1)-I(2) | 107.91(3)  | I(8)-Ag(4)-I(6)     | 110.61(3)  |
| I(1)-Ag(1)-I(6)   | 106.16(3)  | I(8)-Ag(5)-I(1)#3   | 112.87(3)  |

|                   |           |                     |           |
|-------------------|-----------|---------------------|-----------|
| I(4)#1-Ag(1)-I(6) | 116.12(3) | I(1)#2-Ag(5)-I(7)   | 117.73(3) |
| I(2)-Ag(1)-I(6)   | 100.46(3) | I(1)#2-Ag(5)-I(8)   | 112.80(3) |
| I(3)-Ag(2)-I(2)   | 117.89(3) | I(7)-Ag(5)-I(8)     | 108.42(3) |
| I(3)-Ag(2)-I(6)   | 108.44(3) | I(1)#2-Ag(5)-I(1)#3 | 90.31(3)  |
| I(2)-Ag(2)-I(6)   | 104.63(3) | I(7)-Ag(5)-I(1)#3   | 113.92(3) |
| I(3)-Ag(2)-I(5)   | 109.04(3) | I(9)-Ag(6)-I(2)#1   | 126.98(4) |
| I(2)-Ag(2)-I(5)   | 111.51(3) | I(9)-Ag(6)-I(5)#1   | 110.72(4) |
| I(6)-Ag(2)-I(5)   | 104.35(3) | I(2)#1-Ag(6)-I(5)#1 | 110.91(4) |
| I(3)-Ag(3)-I(7)   | 116.56(3) | I(9)-Ag(6)-I(8)     | 103.05(3) |
| I(3)-Ag(3)-I(4)   | 107.95(3) | I(2)#1-Ag(6)-I(8)   | 106.25(4) |
| I(7)-Ag(3)-I(4)   | 113.53(3) | I(5)#1-Ag(6)-I(8)   | 92.73(3)  |
| I(3)-Ag(3)-I(5)   | 109.58(3) | I(8)-Ag(7)-I(4)#1   | 115.36(3) |
| I(7)-Ag(3)-I(5)   | 106.66(3) | I(8)-Ag(7)-I(5)     | 101.40(3) |
| I(4)-Ag(3)-I(5)   | 101.45(3) | I(4)#1-Ag(7)-I(5)   | 97.82(3)  |
| I(9)-Ag(4)-I(7)   | 118.88(3) | I(8)-Ag(7)-I(6)     | 114.62(3) |
| I(9)-Ag(4)-I(8)   | 107.36(3) | I(4)#1-Ag(7)-I(6)   | 118.63(3) |
| I(7)-Ag(4)-I(8)   | 107.68(3) | I(5)-Ag(7)-I(6)     | 104.91(3) |

---

Symmetry code: for **1**: #1  $x, -y+1/2, z+1/2$ ; #2  $x, -y+1/2, z-1/2$ ; #4  $x, y, z+1$ ; for **2**: #1  $-x+1/2, y-1/2, -z+1/2$ ; #2  $-x+1/2, y+1/2, -z+1/2$ ; #3  $x+1/2, -y+1/2, z+1/2$ .
